# Supplementary material for: Covert checks by standardised patients of general practitioners' delivery of new periodic health examinations: clustered cross-sectional study from a consumer organisation
Source: HighWire-hosted journal article supplement (doi:10.1136/bmjopen-2011-000744), 2012-01-01
Supplement: bmjopen-2011-000744supp4.xls [file bmjopen-2011-000744supp4.xls]

## Sheet: VKI-21_GP-offices
VKI 9/2008 Doctor by district distribution
Source: p.23		23 districts in Vienna
Doc.Nr.	ZIP	Distr.Nr.
1	1110	11
2	1010	1
3	1120	12
4	1160	16
5	1210	21
6	1150	15
7	1020	2
8	1090	9
9	1200	20
10	1030	3
11	1100	10
12	1130	13
13	1190	19
14	1040	4
15	1030	3
16	1230	23
17	1190	19
18	1180	18
19	1220	22
20	1140	14
21	1180	18
SORTED by district
			if > 1: # of docs
2	1010	1
7	1020	2
10	1030	3
15	1030	3	2
14	1040	4
8	1090	9
11	1100	10
1	1110	11
3	1120	12
12	1130	13
20	1140	14
6	1150	15
4	1160	16
18	1180	18
21	1180	18	2
13	1190	19
17	1190	19	2
9	1200	20
5	1210	21
19	1220	22
16	1230	23
Conclusion:	5 of 23 districts were not covered. (5,6,7,8, 17)			in 3 of the resulting 18, 2 doctors per district were drawn. These districts do not belong to the populos but the the affluent one (preferred by doctors of choice) ..are not most popolous but the more afflent
	within districts random selection.			… This if there is a bias in doctor selection, being more representative of doctors working in affluent areas.
	7 out of 21 doctors "Wahlärzte" with VU-contract are private rimbursed with
Sampling muss von mir beschrieben und dann mit VKI Expertin durchbesprochen werden.

## Sheet: Vienna_City_GP_data
GP Sampling in Vienna by VKI / Vienna City administration data 2002 (private) and 2007 (overall)
Vienna	2007 data	2002 data	2002 data	2002 data	2002 data	2007 data	2002 data	both in
District Nr.	# of GPs	# of GPs	# contracted	# private	% private	totals		# in sample
1.	59	65	9	56	0.861538			1
2.	76	70	47	23	0.328571			1
3.	73	79	43	36	0.455696			2
4.	39	48	17	31	0.645833			1
5.	37	51	29	22	0.431373
6.	39	43	15	28	0.651163
7.	55	55	15	40	0.727273
8.	45	57	12	45	0.789474	inner districts
9.	53	68	19	49	0.720588	476		1
10.	104	101	81	20	0.19802			1
11.	44	51	38	13	0.254902			1
12.	65	72	42	30	0.416667			1
13.	71	83	23	60	0.722892			1
14.	62	75	40	35	0.466667			1
15.	50	54	38	16	0.296296			1
16.	71	81	52	29	0.358025			1
17.	43	42	28	14	0.333333
18.	63	79	29	50	0.632911			2
19.	83	100	37	63	0.63			2
20.	49	52	39	13	0.25			1
21.	83	90	73	17	0.188889			1
22.	80	79	65	14	0.177215	outer districts		1
23.	80	77	47	30	0.38961	948		1
totals/ avg%	1424	1572	838	734	0.466921	1424		21

## Sheet: Sample_District_Distribution
GP Sampling in Vienna by VKI
Vienna	2007 data	2002 data (N)	2002 data	2002 data	2002 data	2007 data	2008 VKI sample popul.(NS)					2007 data	2002 data	2007 sample					2007 data	2002 data		2007 sample
District Nr.	# of GPs	# of GPs	# private	# contracted	% private	totals		NS % private	# sample (n)	#private	#contract	inner	# private (2002 data)				#reg.health ins.contrac		RICH	# private	# cntrct
1.	59	65	56	9	0.861538				1	1				#sample	#priv	#cntrct			inner +13+18+19			#sample	#priv	#cntrct
2.	76	70	23	47	0.328571				1		1
3.	73	79	36	43	0.455696				2	1	1
4.	39	48	31	17	0.645833				1	1
5.	37	51	22	29	0.431373
6.	39	43	28	15	0.651163
7.	55	55	40	15	0.727273
8.	45	57	45	12	0.789474														versus
9.	53	68	49	19	0.720588	476			1	1		476	330	6	4	2	206		693	503	295	11	7	4
10.	104	101	20	81	0.19802				1		1	outer							poor
11.	44	51	13	38	0.254902				1		1
12.	65	72	30	42	0.416667				1		1
13.	71	83	60	23	0.722892				1	1
14.	62	75	35	40	0.466667				1		1
15.	50	54	16	38	0.296296				1		1
16.	71	81	29	52	0.358025				1		1
17.	43	42	14	28	0.333333
18.	63	79	50	29	0.632911				2	1	1
19.	83	100	63	37	0.63				2	1	1
20.	49	52	13	39	0.25				1		1
21.	83	90	17	73	0.188889				1		1
22.	80	79	14	65	0.177215				1		1
23.	80	77	30	47	0.38961	948			1		1	948	404	15	3	12	632		731	231	543	10	0	10
	1424	1572	734	838		1424	1069	0.2	21	7	14	1424	734	21	7	14	838		1424	734	838	21	7	14
cheksumm		0																		0
2002 data all GPs		1572

## Sheet: Summary_GP_Distribution
	Contracted GP perspective					Private GP perspective
Vienna	2007 data	2002 data	2007 sample			2007 data	2002 data	2007 sample
districts	# of GPs	% private	# in sample		districts	# of GPs	% private	# in sample
inner	476	0.625935	6		RICH	693	503	11
outer	948	0.389961	15		less affluent	731	231	10
total/ avg %	1424	0.466921	21			1424	0.466921	21

## Sheet: Simulation_Sampling
GP Sampling in Vienna by VKI							Contracted GP perspective			private GP perspective			"private"
Vienna	2007 data	2002 data	2002 data	2002 data		2002 data	2007 data	2002 data	2008 sample	2007 data	2002 data	2008 sample	in sample	private GP in simulation
District Nr.	# of GPs	# of GPs	# contracted	# private	in %	% private	# of GPs	% private (2002 data)		# of GPs	% private
1.	59	65	9	56	0.0762943	0.861538			# in sample			# in sample	1	1
2.	76	70	47	23	0.0313351	0.328571
3.	73	79	43	36	0.0490463	0.455696							1
4.	39	48	17	31	0.0422343	0.645833							1	1
5.	37	51	29	22	0.0299728	0.431373
6.	39	43	15	28	0.0381471	0.651163
7.	55	55	15	40	0.0544959	0.727273								1
8.	45	57	12	45	0.0613079	0.789474	inner (1.-9.)
9.	53	68	19	49	0.0667575	0.720588	476	0.625935	6				1	1
10.	104	101	81	20	0.027248	0.19802								1
11.	44	51	38	13	0.0177112	0.254902
12.	65	72	42	30	0.0408719	0.416667				RICH = inner +13.+18.+19.					RICH = inner 9 +13.+18.+19.
13.	71	83	23	60	0.0817439	0.722892				693	503	11	1	1	6
14.	62	75	40	35	0.0476839	0.466667
15.	50	54	38	16	0.0217984	0.296296
16.	71	81	52	29	0.0395095	0.358025
17.	43	42	28	14	0.0190736	0.333333
18.	63	79	29	50	0.0681199	0.632911							1	0
19.	83	100	37	63	0.0858311	0.63							1	1
20.	49	52	39	13	0.0177112	0.25
21.	83	90	73	17	0.0231608	0.188889
22.	80	79	65	14	0.0190736	0.177215	outer (10.-23.)			less affluent					less affluent
23.	80	77	47	30	0.0408719	0.38961	948	0.389961	15	731	231	10			1
totals/avg %	1424	1572	838	734	1	0.466921	1424	0.466921	21	1424	0.466921	21	7	7
Sampling Simulation with 2002 private GP data									Bloc Sampling Simulation by FP *
Districts ordered according to	2002 private GP data			district proportion	PRIVATE Distribution		of 734 GPs	#DIV/0!					VKI bloc sample result of 7 "private GPs" published 10/2008
19.				0.0858311					1				1
13.				0.0817439			0.167575	0					1
1.				0.0762943					1				1
18.				0.0681199			0.144414	0					1
9.				0.0667575					1				1
8.				0.0613079			0.128065	0
7.				0.0544959					1
3.				0.0490463									1
14.				0.0476839			0.151226	0
4.				0.0422343					1				1
23.				0.0408719
12.				0.0408719			0.123978	0
6.				0.0381471					1
16.				0.0395095
2.				0.0313351
5.				0.0299728			0.138965	0
10.				0.027248					1
21.				0.0231608
15.				0.0217984
22.				0.0190736
17.				0.0190736
20.				0.0177112
11.				0.0177112			0.145777	0						*2002 source data
	Totals			1			1		7				7

## Sheet: Sampling_Distribution_Figure
Figure 2
Simulation sampling compared with outcomes of VKI sampling
Outcomes of VKI sampling
GPs	n (N, NS) / # in sample (2002 workforce, VKI lists 2008 with PHE contract)
							GPs (both)	21	(1572, 1069 )
		"private"	7	(734, 211)								"contracted"	14	(838, 858)
rich districts	7	(503, n.a.)		less affluent	0	(231, n.a.)				rich districts	4	(295, n.a.)		less affluent	10	(543, n.a.)
Simulation sampling among 734 private GPs based on 2002 data, unknown PHE contract status
GPs	n (N) / # in simulation sample (private GPs among 2002 workforce)
rich districts	6	(503)		less affluent	1	(231)
